# Supplementary material for: Comprehensive metabolomics profiling reveals common metabolic alterations underlying the four major non-communicable diseases in treated HIV infection
Source: PubMed Central journal article supplement — eBioMedicine. 2021 Aug 19;71:103548. doi: 10.1016/j.ebiom.2021.103548 (PMC8385138; doi:10.1016/j.ebiom.2021.103548), 2021-08-19
Supplement: mmc4.pdf [file mmc4.pdf]

### HIV+ NCs vs HIV- NCs: Pathway analysis

| Pathway                                                | Total | Hits | Raw p      | $-\log_{10}(p)$ | Holm adjus | FDR      | Impact |
|--------------------------------------------------------|-------|------|------------|-----------------|------------|----------|--------|
| Aminoacyl-tRNA biosynthesis                            | 48    | 11   | 0.00014135 | 3.8497          | 0.011873   | 0.011873 | 0.1667 |
| D-Glutamine and D-glutamate metabolism                 | 6     | 3    | 0.0045202  | 2.3448          | 0.37518    | 0.18985  | 0.5    |
| Arginine biosynthesis                                  | 14    | 4    | 0.0098832  | 2.0051          | 0.81043    | 0.27673  | 0.4213 |
| Glyoxylate and dicarboxylate metabolism                | 32    | 6    | 0.014237   | 1.8466          | 1          | 0.29897  | 0.3968 |
| Phenylalanine, tyrosine and tryptophan biosynthesis    | 4     | 2    | 0.022701   | 1.644           | 1          | 0.38138  | 1      |
| Alanine, aspartate and glutamate metabolism            | 28    | 5    | 0.030262   | 1.5191          | 1          | 0.42367  | 0.4455 |
| Nitrogen metabolism                                    | 6     | 2    | 0.052121   | 1.283           | 1          | 0.60359  | 0      |
| Butanoate metabolism                                   | 15    | 3    | 0.06727    | 1.1722          | 1          | 0.60359  | 0.0318 |
| Arachidonic acid metabolism                            | 36    | 5    | 0.077336   | 1.1116          | 1          | 0.60359  | 0.3337 |
| Glycerophospholipid metabolism                         | 36    | 5    | 0.077336   | 1.1116          | 1          | 0.60359  | 0.3991 |
| Histidine metabolism                                   | 16    | 3    | 0.079042   | 1.1021          | 1          | 0.60359  | 0.2213 |
| Valine, leucine and isoleucine biosynthesis            | 8     | 2    | 0.089436   | 1.0485          | 1          | 0.62605  | 0      |
| Pentose and glucuronate interconversions               | 18    | 3    | 0.10502    | 0.97871         | 1          | 0.67861  | 0.4219 |
| Phenylalanine metabolism                               | 10    | 2    | 0.13225    | 0.8786          | 1          | 0.79351  | 0.3571 |
| Glycine, serine and threonine metabolism               | 33    | 4    | 0.15919    | 0.79807         | 1          | 0.89149  | 0.2916 |
| Arginine and proline metabolism                        | 38    | 4    | 0.22644    | 0.64505         | 1          | 1        | 0.1673 |
| Glycerolipid metabolism                                | 16    | 2    | 0.27631    | 0.5586          | 1          | 1        | 0.1059 |
| Linoleic acid metabolism                               | 5     | 1    | 0.28388    | 0.54687         | 1          | 1        | 0      |
| Cysteine and methionine metabolism                     | 33    | 3    | 0.35947    | 0.44433         | 1          | 1        | 0.1472 |
| Citrate cycle (TCA cycle)                              | 20    | 2    | 0.37367    | 0.42751         | 1          | 1        | 0.0769 |
| Ether lipid metabolism                                 | 20    | 2    | 0.37367    | 0.42751         | 1          | 1        | 0.0843 |
| Biosynthesis of unsaturated fatty acids                | 36    | 3    | 0.41357    | 0.38345         | 1          | 1        | 0      |
| Ascorbate and aldarate metabolism                      | 8     | 1    | 0.4142     | 0.38279         | 1          | 1        | 0.5    |
| Pentose phosphate pathway                              | 22    | 2    | 0.42051    | 0.37622         | 1          | 1        | 0      |
| Amino sugar and nucleotide sugar metabolism            | 37    | 3    | 0.43132    | 0.3652          | 1          | 1        | 0.0398 |
| Ubiquinone and other terpenoid-quinone biosynthesis    | 9     | 1    | 0.45219    | 0.34468         | 1          | 1        | 0      |
| Lysine degradation                                     | 25    | 2    | 0.48728    | 0.31222         | 1          | 1        | 0.0047 |
| Caffeine metabolism                                    | 10    | 1    | 0.48774    | 0.31181         | 1          | 1        | 0      |
| Biotin metabolism                                      | 10    | 1    | 0.48774    | 0.31181         | 1          | 1        | 0      |
| Galactose metabolism                                   | 27    | 2    | 0.5291     | 0.27646         | 1          | 1        | 0.0338 |
| Glutathione metabolism                                 | 28    | 2    | 0.54914    | 0.26031         | 1          | 1        | 0.0268 |
| alpha-Linolenic acid metabolism                        | 13    | 1    | 0.58125    | 0.23564         | 1          | 1        | 0      |
| Glycosylphosphatidylinositol (GPI)-anchor biosynthesis | 14    | 1    | 0.60849    | 0.21574         | 1          | 1        | 0.004  |
| Nicotinate and nicotinamide metabolism                 | 15    | 1    | 0.63398    | 0.19792         | 1          | 1        | 0      |
| Pantothenate and CoA biosynthesis                      | 19    | 1    | 0.72052    | 0.14236         | 1          | 1        | 0      |
| Fatty acid degradation                                 | 39    | 2    | 0.73006    | 0.13664         | 1          | 1        | 0      |
| Fructose and mannose metabolism                        | 20    | 1    | 0.73877    | 0.13149         | 1          | 1        | 0      |
| Valine, leucine and isoleucine degradation             | 40    | 2    | 0.74304    | 0.12899         | 1          | 1        | 0.0108 |
| beta-Alanine metabolism                                | 21    | 1    | 0.75584    | 0.12157         | 1          | 1        | 0      |
| Sphingolipid metabolism                                | 21    | 1    | 0.75584    | 0.12157         | 1          | 1        | 0      |
| Pyruvate metabolism                                    | 22    | 1    | 0.77181    | 0.11249         | 1          | 1        | 0.0311 |
| Propanoate metabolism                                  | 23    | 1    | 0.78675    | 0.10417         | 1          | 1        | 0      |
| Glycolysis / Gluconeogenesis                           | 26    | 1    | 0.82598    | 0.083029        | 1          | 1        | 0.0002 |
| Phosphatidylinositol signaling system                  | 28    | 1    | 0.84808    | 0.071564        | 1          | 1        | 0.0015 |
| Porphyrin and chlorophyll metabolism                   | 30    | 1    | 0.86739    | 0.061785        | 1          | 1        | 0      |
| Fatty acid elongation                                  | 39    | 1    | 0.92825    | 0.032337        | 1          | 1        | 0      |
| Pyrimidine metabolism                                  | 39    | 1    | 0.92825    | 0.032337        | 1          | 1        | 0      |
| Tryptophan metabolism                                  | 41    | 1    | 0.93743    | 0.02806         | 1          | 1        | 0.1431 |

|                                              |    |   |         |           |   |   |        |
|----------------------------------------------|----|---|---------|-----------|---|---|--------|
| Steroid biosynthesis                         | 42 | 1 | 0.94158 | 0.026144  | 1 | 1 | 0.0275 |
| Tyrosine metabolism                          | 42 | 1 | 0.94158 | 0.026144  | 1 | 1 | 0.1397 |
| Fatty acid biosynthesis                      | 47 | 1 | 0.95856 | 0.018379  | 1 | 1 | 0.0147 |
| Purine metabolism                            | 65 | 1 | 0.98809 | 0.0052043 | 1 | 1 | 0      |
| Metabolism of xenobiotics by cytochrome P450 | 68 | 1 | 0.99034 | 0.0042167 | 1 | 1 | 0.0102 |
| Steroid hormone biosynthesis                 | 85 | 1 | 0.99707 | 0.001273  | 1 | 1 | 0      |



### HIV– NCs across 3 age groups: Pathway analysis

| Pathway                                                | Total | Hits | Raw p   | -log10(p)  | Holm adjust | FDR | Impact  |
|--------------------------------------------------------|-------|------|---------|------------|-------------|-----|---------|
| D-Arginine and D-ornithine metabolism                  | 4     | 1    | 0.06057 | 2.80397207 | 1           | 1   | 0       |
| Linoleic acid metabolism                               | 5     | 1    | 0.07515 | 2.58822924 | 1           | 1   | 0       |
| Glycerophospholipid metabolism                         | 36    | 2    | 0.10522 | 2.25170188 | 1           | 1   | 0.19895 |
| Arginine and proline metabolism                        | 38    | 2    | 0.11526 | 2.16056483 | 1           | 1   | 0.02385 |
| Ascorbate and aldarate metabolism                      | 8     | 1    | 0.11761 | 2.14038121 | 1           | 1   | 0       |
| Valine, leucine and isoleucine biosynthesis            | 8     | 1    | 0.11761 | 2.14038121 | 1           | 1   | 0       |
| alpha-Linolenic acid metabolism                        | 13    | 1    | 0.18426 | 1.69140748 | 1           | 1   | 0       |
| Glycosylphosphatidylinositol (GPI)-anchor biosynthesis | 14    | 1    | 0.197   | 1.62455155 | 1           | 1   | 0.00399 |
| Butanoate metabolism                                   | 15    | 1    | 0.20955 | 1.56279291 | 1           | 1   | 0.03175 |
| Histidine metabolism                                   | 16    | 1    | 0.2219  | 1.50552845 | 1           | 1   | 0       |
| Pantothenate and CoA biosynthesis                      | 19    | 1    | 0.25788 | 1.35526092 | 1           | 1   | 0       |
| Lysine degradation                                     | 25    | 1    | 0.32511 | 1.12359169 | 1           | 1   | 0.15023 |
| Galactose metabolism                                   | 27    | 1    | 0.34619 | 1.06076752 | 1           | 1   | 0       |
| Phosphatidylinositol signaling system                  | 28    | 1    | 0.35649 | 1.03144909 | 1           | 1   | 0.03736 |
| Alanine, aspartate and glutamate metabolism            | 28    | 1    | 0.35649 | 1.03144909 | 1           | 1   | 0.08654 |
| Inositol phosphate metabolism                          | 30    | 1    | 0.37663 | 0.97649201 | 1           | 1   | 0.12939 |
| Arachidonic acid metabolism                            | 36    | 1    | 0.4335  | 0.83586348 | 1           | 1   | 0       |
| Valine, leucine and isoleucine degradation             | 40    | 1    | 0.46861 | 0.75798441 | 1           | 1   | 0       |
| Fatty acid biosynthesis                                | 47    | 1    | 0.52509 | 0.6441856  | 1           | 1   | 0       |
| Aminoacyl-tRNA biosynthesis                            | 48    | 1    | 0.53267 | 0.62985318 | 1           | 1   | 0       |
| Steroid hormone biosynthesis                           | 85    | 1    | 0.74437 | 0.29521706 | 1           | 1   | 0       |

**HIV+ NCs across 3 age groups: Pathway analysis**

| Pathway                                                | Total | Hits | Raw p    | $-\log_{10}(p)$ | Holm adjus | FDR | Impact  |
|--------------------------------------------------------|-------|------|----------|-----------------|------------|-----|---------|
| Glycerophospholipid metabolism                         | 36    | 2    | 0.020999 | 3.86328         | 1          | 1   | 0.19895 |
| Linoleic acid metabolism                               | 5     | 1    | 0.031885 | 3.44562         | 1          | 1   | 0       |
| alpha-Linolenic acid metabolism                        | 13    | 1    | 0.081002 | 2.513281        | 1          | 1   | 0       |
| Glycosylphosphatidylinositol (GPI)-anchor biosynthesis | 14    | 1    | 0.086981 | 2.442066        | 1          | 1   | 0.00399 |
| Nicotinate and nicotinamide metabolism                 | 15    | 1    | 0.092925 | 2.375963        | 1          | 1   | 0       |
| Histidine metabolism                                   | 16    | 1    | 0.098834 | 2.314314        | 1          | 1   | 0       |
| Glutathione metabolism                                 | 28    | 1    | 0.16709  | 1.789223        | 1          | 1   | 0.00709 |
| Arachidonic acid metabolism                            | 36    | 1    | 0.20998  | 1.560743        | 1          | 1   | 0       |

### HIV+ SCA vs HIV+ NCs: Pathway analysis

| Pathway                                                | Total | Hits | Raw p    | -log10(p) | Holm adjus | FDR    | Impact  |
|--------------------------------------------------------|-------|------|----------|-----------|------------|--------|---------|
| Cysteine and methionine metabolism                     | 33    | 3    | 0.010281 | 1.988     | 0.86362    | 0.5497 | 0.13865 |
| Glycerophospholipid metabolism                         | 36    | 3    | 0.013088 | 1.8831    | 1          | 0.5497 | 0.33882 |
| Pantothenate and CoA biosynthesis                      | 19    | 2    | 0.028425 | 1.5463    | 1          | 0.7206 | 0.02143 |
| Sphingolipid metabolism                                | 21    | 2    | 0.034316 | 1.4645    | 1          | 0.7206 | 0.00406 |
| Glutathione metabolism                                 | 28    | 2    | 0.05819  | 1.2352    | 1          | 0.818  | 0.01052 |
| Linoleic acid metabolism                               | 5     | 1    | 0.069068 | 1.1607    | 1          | 0.818  | 0       |
| Glyoxylate and dicarboxylate metabolism                | 32    | 2    | 0.073805 | 1.1319    | 1          | 0.818  | 0.07408 |
| Glycine, serine and threonine metabolism               | 33    | 2    | 0.077903 | 1.1084    | 1          | 0.818  | 0.21707 |
| Thiamine metabolism                                    | 7     | 1    | 0.0954   | 1.0205    | 1          | 0.8904 | 0       |
| Taurine and hypotaurine metabolism                     | 8     | 1    | 0.1083   | 0.96538   | 1          | 0.9097 | 0       |
| Aminoacyl-tRNA biosynthesis                            | 48    | 2    | 0.14667  | 0.83367   | 1          | 1      | 0.16667 |
| alpha-Linolenic acid metabolism                        | 13    | 1    | 0.1702   | 0.76905   | 1          | 1      | 0       |
| Glycosylphosphatidylinositol (GPI)-anchor biosynthesis | 14    | 1    | 0.18207  | 0.73975   | 1          | 1      | 0.00399 |
| Glycerolipid metabolism                                | 16    | 1    | 0.20534  | 0.68752   | 1          | 1      | 0.01246 |
| Citrate cycle (TCA cycle)                              | 20    | 1    | 0.25     | 0.60206   | 1          | 1      | 0.09038 |
| beta-Alanine metabolism                                | 21    | 1    | 0.26079  | 0.58372   | 1          | 1      | 0.39925 |
| Propanoate metabolism                                  | 23    | 1    | 0.28191  | 0.54989   | 1          | 1      | 0       |
| Alanine, aspartate and glutamate metabolism            | 28    | 1    | 0.33224  | 0.47855   | 1          | 1      | 0       |
| Phosphatidylinositol signaling system                  | 28    | 1    | 0.33224  | 0.47855   | 1          | 1      | 0.00152 |
| Arachidonic acid metabolism                            | 36    | 1    | 0.40582  | 0.39167   | 1          | 1      | 0       |
| Pyrimidine metabolism                                  | 39    | 1    | 0.43136  | 0.36516   | 1          | 1      | 0       |
| Fatty acid biosynthesis                                | 47    | 1    | 0.49446  | 0.30587   | 1          | 1      | 0       |
| Purine metabolism                                      | 65    | 1    | 0.6129   | 0.21261   | 1          | 1      | 0.00528 |

### HIV+ LF vs HIV+ NCs: Pathway analysis

| Pathway                                                | Total | Hits | Raw p     | $-\log_{10}(p)$ | Holm adjus | FDR     | Impact  |
|--------------------------------------------------------|-------|------|-----------|-----------------|------------|---------|---------|
| D-Glutamine and D-glutamate metabolism                 | 6     | 3    | 0.0004908 | 3.3091          | 0.041225   | 0.04123 | 0.5     |
| Glycerophospholipid metabolism                         | 36    | 5    | 0.0038432 | 2.4153          | 0.31898    | 0.16141 | 0.39907 |
| Arginine biosynthesis                                  | 14    | 3    | 0.0075251 | 2.1235          | 0.61706    | 0.18708 | 0.19289 |
| Alanine, aspartate and glutamate metabolism            | 28    | 4    | 0.0089088 | 2.0502          | 0.72161    | 0.18708 | 0.44552 |
| Nitrogen metabolism                                    | 6     | 2    | 0.012493  | 1.9033          | 0.99945    | 0.20988 | 0       |
| Valine, leucine and isoleucine biosynthesis            | 8     | 2    | 0.022433  | 1.6491          | 1          | 0.31407 | 0       |
| Butanoate metabolism                                   | 15    | 2    | 0.073543  | 1.1335          | 1          | 0.88251 | 0.03175 |
| Pantothenate and CoA biosynthesis                      | 19    | 2    | 0.11102   | 0.95461         | 1          | 1       | 0.02143 |
| Linoleic acid metabolism                               | 5     | 1    | 0.14287   | 0.84507         | 1          | 1       | 0       |
| Aminoacyl-tRNA biosynthesis                            | 48    | 3    | 0.17566   | 0.75532         | 1          | 1       | 0       |
| Glyoxylate and dicarboxylate metabolism                | 32    | 2    | 0.25288   | 0.59709         | 1          | 1       | 0       |
| Glycine, serine and threonine metabolism               | 33    | 2    | 0.26432   | 0.57787         | 1          | 1       | 0.14327 |
| Arginine and proline metabolism                        | 38    | 2    | 0.32144   | 0.49291         | 1          | 1       | 0.14386 |
| alpha-Linolenic acid metabolism                        | 13    | 1    | 0.33094   | 0.48026         | 1          | 1       | 0       |
| Pyrimidine metabolism                                  | 39    | 2    | 0.33277   | 0.47785         | 1          | 1       | 0       |
| Valine, leucine and isoleucine degradation             | 40    | 2    | 0.34406   | 0.46336         | 1          | 1       | 0.02168 |
| Glycosylphosphatidylinositol (GPI)-anchor biosynthesis | 14    | 1    | 0.3514    | 0.4542          | 1          | 1       | 0.00399 |
| Histidine metabolism                                   | 16    | 1    | 0.39049   | 0.40839         | 1          | 1       | 0       |
| Glycerolipid metabolism                                | 16    | 1    | 0.39049   | 0.40839         | 1          | 1       | 0.01246 |
| Ether lipid metabolism                                 | 20    | 1    | 0.4619    | 0.33546         | 1          | 1       | 0       |
| beta-Alanine metabolism                                | 21    | 1    | 0.47843   | 0.32019         | 1          | 1       | 0.39925 |
| Propanoate metabolism                                  | 23    | 1    | 0.51001   | 0.29242         | 1          | 1       | 0       |
| Galactose metabolism                                   | 27    | 1    | 0.56766   | 0.24591         | 1          | 1       | 0       |
| Phosphatidylinositol signaling system                  | 28    | 1    | 0.581     | 0.23582         | 1          | 1       | 0.00152 |
| Glutathione metabolism                                 | 28    | 1    | 0.581     | 0.23582         | 1          | 1       | 0.01966 |
| Purine metabolism                                      | 65    | 2    | 0.59581   | 0.2249          | 1          | 1       | 0       |
| Porphyrin and chlorophyll metabolism                   | 30    | 1    | 0.60649   | 0.21718         | 1          | 1       | 0       |
| Cysteine and methionine metabolism                     | 33    | 1    | 0.6419    | 0.19253         | 1          | 1       | 0.02089 |
| Arachidonic acid metabolism                            | 36    | 1    | 0.67418   | 0.17122         | 1          | 1       | 0       |
| Tyrosine metabolism                                    | 42    | 1    | 0.73044   | 0.13642         | 1          | 1       | 0       |
| Steroid hormone biosynthesis                           | 85    | 1    | 0.93226   | 0.030462        | 1          | 1       | 0       |

### HIV+ NCI vs HIV+ NCs: Pathway analysis

| Pathway                                                | Total | Hits | Raw p    | -log10(p) | Holm adjust | FDR     | Impact  |
|--------------------------------------------------------|-------|------|----------|-----------|-------------|---------|---------|
| Alanine, aspartate and glutamate metabolism            | 28    | 6    | 0.001361 | 2.8662    | 0.11431     | 0.07304 | 0.44552 |
| D-Glutamine and D-glutamate metabolism                 | 6     | 3    | 0.001739 | 2.7597    | 0.14434     | 0.07304 | 0.5     |
| Linoleic acid metabolism                               | 5     | 2    | 0.01943  | 1.7115    | 1           | 0.35097 | 0       |
| Glycerophospholipid metabolism                         | 36    | 5    | 0.023001 | 1.6383    | 1           | 0.35097 | 0.30734 |
| Arachidonic acid metabolism                            | 36    | 5    | 0.023001 | 1.6383    | 1           | 0.35097 | 0.33373 |
| Nitrogen metabolism                                    | 6     | 2    | 0.028275 | 1.5486    | 1           | 0.35097 | 0       |
| Butanoate metabolism                                   | 15    | 3    | 0.029247 | 1.5339    | 1           | 0.35097 | 0.03175 |
| Histidine metabolism                                   | 16    | 3    | 0.03482  | 1.4582    | 1           | 0.36561 | 0.04918 |
| Valine, leucine and isoleucine biosynthesis            | 8     | 2    | 0.049694 | 1.3037    | 1           | 0.46381 | 0       |
| Ether lipid metabolism                                 | 20    | 3    | 0.062108 | 1.2069    | 1           | 0.5217  | 0.08434 |
| Neomycin, kanamycin and gentamicin biosynthesis        | 2     | 1    | 0.090774 | 1.042     | 1           | 0.69318 | 0       |
| Galactose metabolism                                   | 27    | 3    | 0.12682  | 0.89682   | 1           | 0.87335 | 0.06879 |
| Arginine biosynthesis                                  | 14    | 2    | 0.13516  | 0.86915   | 1           | 0.87335 | 0.11675 |
| Glyoxylate and dicarboxylate metabolism                | 32    | 3    | 0.18312  | 0.73727   | 1           | 1       | 0       |
| Pentose and glucuronate interconversions               | 18    | 2    | 0.20228  | 0.69405   | 1           | 1       | 0.25    |
| Citrate cycle (TCA cycle)                              | 20    | 2    | 0.23716  | 0.62495   | 1           | 1       | 0.07771 |
| Propanoate metabolism                                  | 23    | 2    | 0.28998  | 0.53764   | 1           | 1       | 0       |
| Ascorbate and aldarate metabolism                      | 8     | 1    | 0.3171   | 0.49881   | 1           | 1       | 0.5     |
| Glutathione metabolism                                 | 28    | 2    | 0.37675  | 0.42394   | 1           | 1       | 0.02675 |
| Caffeine metabolism                                    | 10    | 1    | 0.3794   | 0.4209    | 1           | 1       | 0       |
| Aminoacyl-tRNA biosynthesis                            | 48    | 3    | 0.38744  | 0.41179   | 1           | 1       | 0       |
| alpha-Linolenic acid metabolism                        | 13    | 1    | 0.46249  | 0.3349    | 1           | 1       | 0       |
| Glycosylphosphatidylinositol (GPI)-anchor biosynthesis | 14    | 1    | 0.48767  | 0.31187   | 1           | 1       | 0.00399 |
| Arginine and proline metabolism                        | 38    | 2    | 0.53498  | 0.27166   | 1           | 1       | 0.086   |
| Valine, leucine and isoleucine degradation             | 40    | 2    | 0.56329  | 0.24927   | 1           | 1       | 0.02168 |
| Starch and sucrose metabolism                          | 18    | 1    | 0.57727  | 0.23862   | 1           | 1       | 0.4207  |
| Pantothenate and CoA biosynthesis                      | 19    | 1    | 0.59714  | 0.22393   | 1           | 1       | 0       |
| Sphingolipid metabolism                                | 21    | 1    | 0.63415  | 0.19781   | 1           | 1       | 0.15416 |
| Pentose phosphate pathway                              | 22    | 1    | 0.65138  | 0.18617   | 1           | 1       | 0       |
| Glycolysis / Gluconeogenesis                           | 26    | 1    | 0.71264  | 0.14713   | 1           | 1       | 0.00021 |
| Inositol phosphate metabolism                          | 30    | 1    | 0.76326  | 0.11733   | 1           | 1       | 0       |
| Porphyrin and chlorophyll metabolism                   | 30    | 1    | 0.76326  | 0.11733   | 1           | 1       | 0       |
| Glycine, serine and threonine metabolism               | 33    | 1    | 0.79536  | 0.099438  | 1           | 1       | 0.05034 |
| Purine metabolism                                      | 65    | 2    | 0.81698  | 0.08779   | 1           | 1       | 0.01651 |
| Biosynthesis of unsaturated fatty acids                | 36    | 1    | 0.82315  | 0.08452   | 1           | 1       | 0       |
| Amino sugar and nucleotide sugar metabolism            | 37    | 1    | 0.83156  | 0.080106  | 1           | 1       | 0.01991 |
| Pyrimidine metabolism                                  | 39    | 1    | 0.84722  | 0.072006  | 1           | 1       | 0       |
| Tryptophan metabolism                                  | 41    | 1    | 0.86143  | 0.064778  | 1           | 1       | 0       |
| Metabolism of xenobiotics by cytochrome P450           | 68    | 1    | 0.96342  | 0.016185  | 1           | 1       | 0.0102  |
| Steroid hormone biosynthesis                           | 85    | 1    | 0.98439  | 0.0068345 | 1           | 1       | 0       |



### HIV+ renal impairment vs HIV+ NCs: Pathway analysis

| Pathway                                     | Total | Hits | Raw p    | $-\log_{10}(p)$ | Holm adjust | FDR | Impact  |
|---------------------------------------------|-------|------|----------|-----------------|-------------|-----|---------|
| Glycerophospholipid metabolism              | 36    | 3    | 0.048598 | 1.3134          | 1           | 1   | 0.24757 |
| Histidine metabolism                        | 16    | 2    | 0.051323 | 1.2897          | 1           | 1   | 0.04918 |
| Linoleic acid metabolism                    | 5     | 1    | 0.111    | 0.9547          | 1           | 1   | 0       |
| Phosphatidylinositol signaling system       | 28    | 2    | 0.13613  | 0.86604         | 1           | 1   | 0.03888 |
| Alanine, aspartate and glutamate metabolism | 28    | 2    | 0.13613  | 0.86604         | 1           | 1   | 0.08654 |
| Ascorbate and aldarate metabolism           | 8     | 1    | 0.17174  | 0.76513         | 1           | 1   | 0       |
| Arginine and proline metabolism             | 38    | 2    | 0.21996  | 0.65766         | 1           | 1   | 0.06099 |
| Pyrimidine metabolism                       | 39    | 2    | 0.22864  | 0.64085         | 1           | 1   | 0.14395 |
| alpha-Linolenic acid metabolism             | 13    | 1    | 0.26413  | 0.57818         | 1           | 1   | 0       |
| Arginine biosynthesis                       | 14    | 1    | 0.28136  | 0.55073         | 1           | 1   | 0.22843 |
| Aminoacyl-tRNA biosynthesis                 | 48    | 2    | 0.30739  | 0.51231         | 1           | 1   | 0.16667 |
| Glycerolipid metabolism                     | 16    | 1    | 0.31467  | 0.50215         | 1           | 1   | 0.01246 |
| Pantothenate and CoA biosynthesis           | 19    | 1    | 0.36182  | 0.4415          | 1           | 1   | 0       |
| beta-Alanine metabolism                     | 21    | 1    | 0.39149  | 0.40728         | 1           | 1   | 0       |
| Sphingolipid metabolism                     | 21    | 1    | 0.39149  | 0.40728         | 1           | 1   | 0       |
| Galactose metabolism                        | 27    | 1    | 0.47268  | 0.32544         | 1           | 1   | 0       |
| Inositol phosphate metabolism               | 30    | 1    | 0.50922  | 0.2931          | 1           | 1   | 0.12939 |
| Glyoxylate and dicarboxylate metabolism     | 32    | 1    | 0.5322   | 0.27393         | 1           | 1   | 0.04233 |
| Cysteine and methionine metabolism          | 33    | 1    | 0.54329  | 0.26497         | 1           | 1   | 0.02184 |
| Glycine, serine and threonine metabolism    | 33    | 1    | 0.54329  | 0.26497         | 1           | 1   | 0.21707 |
| Arachidonic acid metabolism                 | 36    | 1    | 0.57506  | 0.24029         | 1           | 1   | 0       |
| Tryptophan metabolism                       | 41    | 1    | 0.6233   | 0.20531         | 1           | 1   | 0.03901 |

HIV+ NCI vs HIV+ NCs: Pathway analysis

**Sensitivity analysis: NCI patients with moderate fibrosis (FIB4 1.45–<3.25) were excluded.**

| Pathway                                     | Total Hits | Raw p | -ln(p)    | Holm adjust | FDR     | Impact  |         |
|---------------------------------------------|------------|-------|-----------|-------------|---------|---------|---------|
| Arachidonic acid metabolism                 | 62         | 4     | 0.0039017 | 5.5463      | 0.31213 | 0.23256 | 0.234   |
| D-Glutamine and D-glutamate metabolism      | 11         | 2     | 0.0058139 | 5.1475      | 0.4593  | 0.23256 | 0.19786 |
| Alanine, aspartate and glutamate metabolism | 24         | 2     | 0.026769  | 3.6205      | 1       | 0.66754 | 0.20703 |
| Valine, leucine and isoleucine biosynthesis | 27         | 2     | 0.033377  | 3.3999      | 1       | 0.66754 | 0.0885  |
| Glycerophospholipid metabolism              | 39         | 2     | 0.065128  | 2.7314      | 1       | 1       | 0.00985 |
| Pyrimidine metabolism                       | 60         | 2     | 0.13574   | 1.997       | 1       | 1       | 0       |
| Aminoacyl-tRNA biosynthesis                 | 75         | 2     | 0.19328   | 1.6436      | 1       | 1       | 0       |
| Ether lipid metabolism                      | 23         | 1     | 0.22194   | 1.5054      | 1       | 1       | 0       |
| Sphingolipid metabolism                     | 25         | 1     | 0.23882   | 1.432       | 1       | 1       | 0.1402  |
| Pantothenate and CoA biosynthesis           | 27         | 1     | 0.25535   | 1.3651      | 1       | 1       | 0.07366 |
| Nitrogen metabolism                         | 39         | 1     | 0.34751   | 1.057       | 1       | 1       | 0       |
| Valine, leucine and isoleucine degradation  | 40         | 1     | 0.35468   | 1.0366      | 1       | 1       | 0.01657 |
| Histidine metabolism                        | 44         | 1     | 0.38258   | 0.96081     | 1       | 1       | 0.01609 |
| Nicotinate and nicotinamide metabolism      | 44         | 1     | 0.38258   | 0.96081     | 1       | 1       | 0.01665 |
| Glycine, serine and threonine metabolism    | 48         | 1     | 0.40933   | 0.89324     | 1       | 1       | 0.09661 |
| Arginine and proline metabolism             | 77         | 1     | 0.57251   | 0.55772     | 1       | 1       | 0       |
| Tryptophan metabolism                       | 79         | 1     | 0.582     | 0.54128     | 1       | 1       | 0.0478  |
| Purine metabolism                           | 92         | 1     | 0.63892   | 0.44797     | 1       | 1       | 0       |
| Porphyrin and chlorophyll metabolism        | 104        | 1     | 0.68479   | 0.37864     | 1       | 1       | 0       |
